# Supplementary material for: Understanding symptom contribution to sex inequality in bladder and renal cancer stage at diagnosis
Source: PubMed Central journal article supplement (PMC11249815; doi:10.1002/bco2.360), 2024-04-19
Supplement: BCO2-5-691-s002.pdf [file BCO2-5-691-s002.pdf]

**Appendix 1: Proportion of patients with advanced-stage bladder cancer by symptoms and sex**

| Presenting symptoms      | Male  |                                     | Female |                                     |
|--------------------------|-------|-------------------------------------|--------|-------------------------------------|
|                          | Total | Number of advanced-stage cancer (%) | Total  | Number of advanced-stage cancer (%) |
| Overall                  | 854   | 88 (10.3)                           | 297    | 63 (21.2)                           |
| Haematuria               |       |                                     |        |                                     |
| Yes                      | 422   | 27 (6.4)                            | 83     | 17 (20.5)                           |
| No                       | 432   | 61 (14.1)                           | 214    | 46 (21.5)                           |
| Urinary tract infections |       |                                     |        |                                     |
| Yes                      | 106   | 17 (16.0)                           | 82     | 20 (24.4)                           |
| No                       | 748   | 71 (9.5)                            | 215    | 43 (20.0)                           |
| Systemic symptoms        |       |                                     |        |                                     |
| Yes                      | 150   | 14 (9.3)                            | 55     | 15 (27.3)                           |
| No                       | 704   | 74 (10.5)                           | 242    | 48 (19.8)                           |
| Abdominal symptoms       |       |                                     |        |                                     |
| Yes                      | 117   | 24 (20.5)                           | 53     | 8 (15.1)                            |
| No                       | 737   | 64 (8.7)                            | 244    | 55 (22.5)                           |
| Urogenital symptoms      |       |                                     |        |                                     |
| Yes                      | 35    | 3 (8.6)                             | 6      | 0                                   |
| No                       | 819   | 85 (10.4)                           | 291    | 63 (21.6)                           |
| Multiple symptoms        |       |                                     |        |                                     |
| Yes                      | 24    | 3 (12.5)                            | 18     | 3 (16.7)                            |
| No                       | 830   | 85 (10.2)                           | 279    | 60 (21.5)                           |

## Appendix 2: Crude and adjusted predicted probabilities for advanced-stage cancer by sex and symptoms

### A: Bladder cancer

| Presenting symptoms | Crude predicted probabilities for advanced-stage bladder cancer (95% CI) |                     | Adjusted predicted probabilities for advanced-stage bladder cancer (95% CI) |                     |
|---------------------|--------------------------------------------------------------------------|---------------------|-----------------------------------------------------------------------------|---------------------|
|                     | Male                                                                     | Female              | Male                                                                        | Female              |
| Haematuria          | 0.06 (0.04 – 0.09)                                                       | 0.20 (0.12 – 0.29)  | 0.07 (0.04 – 0.09)                                                          | 0.21 (0.12 – 0.29)  |
| UTI                 | 0.16 (0.09 – 0.23)                                                       | 0.24 (0.15 – 0.34)  | 0.17 (0.10 – 0.24)                                                          | 0.24 (0.15 – 0.33)  |
| Abdominal symptoms  | 0.21 (0.13 – 0.28)                                                       | 0.15 (0.05 – 0.25)  | 0.20 (0.13 – 0.27)                                                          | 0.15 (0.05 – 0.24)  |
| Systemic symptoms   | 0.09 (0.05 – 0.14)                                                       | 0.27 (0.16 – 0.39)  | 0.10 (0.05 – 0.14)                                                          | 0.24 (0.13 – 0.35)  |
| Urogenital symptoms | 0.09 (-0.01 – 0.18)                                                      | -                   | 0.10 (-0.01 – 0.20)                                                         | -                   |
| Multiple symptoms   | 0.13 (-0.01 – 0.26)                                                      | 0.17 (-0.01 – 0.34) | 0.10 (0.00 – 0.27)                                                          | 0.14 (-0.01 – 0.28) |

### B: Renal cancer

| Presenting symptoms | Crude predicted probabilities for advanced-stage bladder cancer (95% CI) |                    | Adjusted predicted probabilities for advanced-stage bladder cancer (95% CI) |                    |
|---------------------|--------------------------------------------------------------------------|--------------------|-----------------------------------------------------------------------------|--------------------|
|                     | Male                                                                     | Female             | Male                                                                        | Female             |
| Haematuria          | 0.58 (0.46 – 0.69)                                                       | 0.68 (0.48 – 0.89) | 0.59 (0.48 – 0.71)                                                          | 0.71 (0.52 – 0.91) |
| UTI                 | 0.37 (0.15 – 0.59)                                                       | 0.57 (0.36 – 0.78) | 0.37 (0.16 – 0.58)                                                          | 0.55 (0.34 – 0.75) |
| Abdominal symptoms  | 0.61 (0.51 – 0.72)                                                       | 0.46 (0.33 – 0.58) | 0.60 (0.50 – 0.71)                                                          | 0.47 (0.35 – 0.59) |
| Systemic symptoms   | 0.53 (0.43 – 0.64)                                                       | 0.59 (0.45 – 0.73) | 0.54 (0.44 – 0.64)                                                          | 0.58 (0.44 – 0.71) |
| Urogenital symptoms | 0.56 (0.32 – 0.81)                                                       | 0.43 (0.06 – 0.80) | 0.54 (0.30 – 0.78)                                                          | 0.39 (0.04 – 0.74) |
| Multiple symptoms   | 0.44 (0.12 – 0.77)                                                       | 0.60 (0.17 – 1.03) | 0.34 (0.04 – 0.64)                                                          | 0.63 (0.22 – 1.04) |

**Appendix 3: Adjusted predicted probability of advanced-stage cancer diagnosis by age group and presenting symptoms**

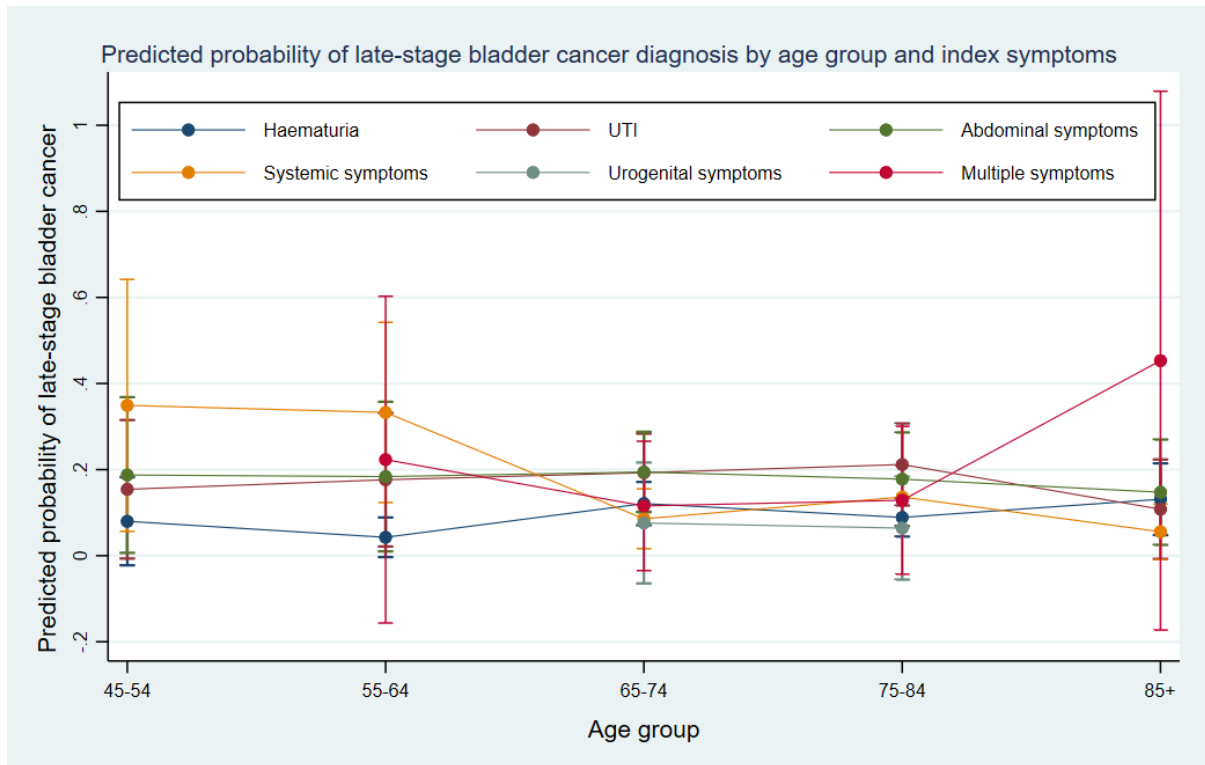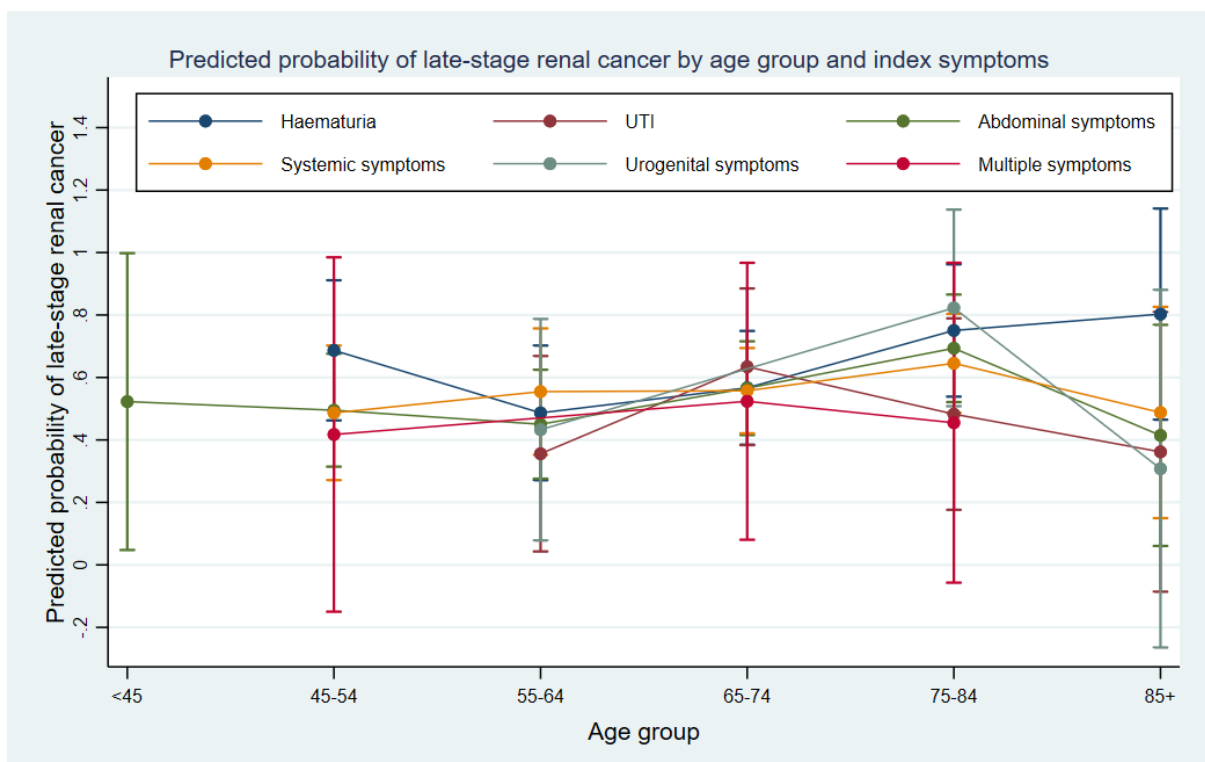

**Appendix 4: Sensitivity analyses – bladder cancer**

| Variable                    | Total diagnostic interval <91 days |         |                    |         | Total diagnostic interval <61 days |         |                    |         |
|-----------------------------|------------------------------------|---------|--------------------|---------|------------------------------------|---------|--------------------|---------|
|                             | Bladder cancer                     |         | Renal cancer       |         | Bladder cancer                     |         | Renal cancer       |         |
|                             | OR (95% CI)                        | p-value | OR (95% CI)        | p-value | OR (95% CI)                        | p-value | OR (95% CI)        | p-value |
| <b>Age group</b>            |                                    |         |                    |         |                                    |         |                    |         |
| <45                         | -                                  | 0.884   | -                  | 0.284   | -                                  | 0.970   | -                  | 0.187   |
| 45-54                       | 1.01 (0.28, 3.63)                  |         | 2.95 (0.82, 10.63) |         | 0.95 (0.22, 4.01)                  |         | 5.79 (0.86, 39.26) |         |
| 55-64                       | Reference                          |         | Reference          |         | Reference                          |         | Reference          |         |
| 65-74                       | 1.43 (0.59, 3.48)                  |         | 1.35 (0.46, 3.98)  |         | 1.30 (0.49, 3.44)                  |         | 1.12 (0.29, 4.35)  |         |
| 75-84                       | 1.07 (0.42, 2.71)                  |         | 2.89 (0.82, 10.18) |         | 1.07 (0.39, 2.92)                  |         | 3.61 (0.69, 18.96) |         |
| 85+                         | 1.06 (0.32, 3.44)                  |         | 1.14 (0.18, 7.04)  |         | 1.26 (0.34, 4.66)                  |         | 3.26 (0.23, 46.99) |         |
| <b>Sex</b>                  |                                    |         |                    |         |                                    |         |                    |         |
| Male                        | Reference                          | 0.014   |                    | 0.904   | Reference                          | 0.034   | Reference          | 0.228   |
| Female                      | 2.24 (1.18, 4.27)                  |         | 0.95 (0.41, 2.20)  |         | 2.20 (1.06, 4.54)                  |         | 0.47 (0.14, 1.60)  |         |
| <b>Deprivation quintile</b> |                                    |         |                    |         |                                    |         |                    |         |
| 1                           | Reference                          | 0.666   | Reference          | 0.890   | Reference                          | 0.825   | Reference          | 0.992   |
| 2                           | 1.01 (0.46, 2.23)                  |         | 1.01 (0.35, 2.88)  |         | 1.33 (0.57, 3.12)                  |         | 0.71 (0.16, 3.11)  |         |
| 3                           | 0.87 (0.37, 2.06)                  |         | 1.24 (0.41, 3.78)  |         | 0.90 (0.34, 2.34)                  |         | 0.90 (0.22, 3.78)  |         |
| 4                           | 0.58 (0.24, 1.40)                  |         | 1.63 (0.42, 6.37)  |         | 0.76 (0.30, 1.91)                  |         | 0.76 (0.11, 5.43)  |         |
| 5                           | 0.61 (0.22, 1.71)                  |         | 0.76 (0.18, 3.18)  |         | 0.94 (0.31, 2.85)                  |         | 0.74 (0.08, 6.83)  |         |
| <b>Route to diagnosis</b>   |                                    |         |                    |         |                                    |         |                    |         |
| Routine GP                  | Reference                          | <0.001  | Reference          | 0.432   | Reference                          | <0.001  | Reference          | 0.616   |
| TWW                         | 2.44 (1.07, 5.52)                  |         | 0.51 (0.18, 1.45)  |         | 1.83 (0.75, 4.43)                  |         | 0.36 (0.08, 1.62)  |         |
| Emergency presentation      | 12.61 (4.61, 34.49)                |         | 1.64 (0.42, 6.45)  |         | 10.30 (3.41, 31.17)                |         | 1.04 (0.18, 6.12)  |         |
| Inpatient elective          | 2.00 (0.15, 26.11)                 |         | 0.23 (0.01, 3.53)  |         | 1.56 (0.11, 21.19)                 |         | 0.24 (0.01, 5.03)  |         |
| Other outpatient            | 1.41 (0.42, 4.69)                  |         | 0.78 (0.14, 4.20)  |         | 1.34 (0.38, 4.72)                  |         | 1.43 (0.11, 18.85) |         |
| Unknown                     | 1.00 (0.00, 0.00)                  |         | 0.52 (0.09, 3.03)  |         | -                                  |         | 0.65 (0.07, 6.45)  |         |
| <b>Presenting symptoms</b>  |                                    |         |                    |         |                                    |         |                    |         |

|                           |                    |       |                    |       |                    |       |                    |       |
|---------------------------|--------------------|-------|--------------------|-------|--------------------|-------|--------------------|-------|
| Haematuria                | Reference          | 0.035 | Reference          | 0.659 | Reference          | 0.045 | Reference          | 0.372 |
| UTI                       | 2.20 (1.01, 4.77)  |       | 0.91 (0.07, 11.21) |       | 2.29 (0.93, 5.67)  |       | -                  |       |
| Abdominal symptoms        | 2.70 (0.98, 7.42)  |       | 0.57 (0.23, 1.41)  |       | 2.89 (0.95, 8.80)  |       | 1.15 (0.32, 4.16)  |       |
| Systemic symptoms         | 1.05 (0.26, 4.30)  |       | 0.95 (0.31, 2.95)  |       | 0.85 (0.14, 5.24)  |       | 4.26 (0.65, 27.91) |       |
| Other urogenital symptoms | 6.38 (1.33, 30.59) |       | 1.00 (0.00, 0.00)  |       | 7.06 (1.41, 35.32) |       | -                  |       |
| Multiple symptoms         | 0.41 (0.04, 3.88)  |       | 0.30 (0.03, 2.79)  |       | 0.48 (0.05, 4.84)  |       | 0.48 (0.04, 5.03)  |       |
