# Supplementary material for: Understanding symptom contribution to sex inequality in bladder and renal cancer stage at diagnosis
Source: PubMed Central journal article supplement (PMC11249815; doi:10.1002/bco2.360), 2024-04-19
Supplement: BCO2-5-691-s003.pdf [file BCO2-5-691-s003.pdf]

## BJU INTERNATIONAL AUTHOR PRE-SUBMISSION CHECKLIST

Please complete this checklist and upload together with your manuscript submission at <https://mc.manuscriptcentral.com/bjui>

**Please note that manuscripts submitted with an incomplete or incorrectly completed form will be returned to the authors without review**

| GUIDELINES                                                                                                                                                                                                                         | Yes                                 | No/Not Applicable                   |
|------------------------------------------------------------------------------------------------------------------------------------------------------------------------------------------------------------------------------------|-------------------------------------|-------------------------------------|
| <b>BJU International Author Guidelines.</b> We have read and adhere to the <a href="#">Author Guidelines</a>                                                                                                                       | <input checked="" type="checkbox"/> |                                     |
| <b>BJU International How to write a Manuscript.</b> We have read <a href="#">BJUI's Advice on preparing a scientific manuscript</a>                                                                                                | <input checked="" type="checkbox"/> | <input type="checkbox"/>            |
| <b>Plagiarism check.</b> We accept that our manuscript may be screened for plagiarism against previously published work                                                                                                            | <input checked="" type="checkbox"/> |                                     |
| <b>Declaration of Interests.</b> We include a full statement of declaration of interests for all authors                                                                                                                           | <input checked="" type="checkbox"/> |                                     |
| <b>Ethics.</b> We adhere to Best Practice Guidelines on Publication Ethics                                                                                                                                                         | <input checked="" type="checkbox"/> |                                     |
| <b>References.</b> References conform to the Vancouver style                                                                                                                                                                       | <input checked="" type="checkbox"/> |                                     |
| <b>Funding</b> (if applicable). We include information regarding research funding                                                                                                                                                  | <input checked="" type="checkbox"/> | <input type="checkbox"/>            |
| <b>Reporting of complications</b> (if applicable). We have used the Clavien-Dindo classification of surgical complications and follow the EAU guideline recommendations (please see <a href="#">Author Guidelines</a> for details) | <input type="checkbox"/>            | <input checked="" type="checkbox"/> |

| REPORTING STATISTICS, TABLES AND FIGURES                                                                                                                                                                                                                                                                                                                                           | Yes                                 | No/Not Applicable        |
|------------------------------------------------------------------------------------------------------------------------------------------------------------------------------------------------------------------------------------------------------------------------------------------------------------------------------------------------------------------------------------|-------------------------------------|--------------------------|
| <b>Reporting Statistics.</b> We have read and adhere to the <a href="#">BJU International Guidelines for Reporting Statistics</a>                                                                                                                                                                                                                                                  | <input checked="" type="checkbox"/> | <input type="checkbox"/> |
| We adhere to <b>Rule 2.1.</b> We follow existing <b>Reporting Guidelines</b> for the type of study we are reporting (e.g., CONSORT for RCTs, PRISMA and AMSTAR for Systematic Reviews, STROBE for observational studies, ReMARK for marker studies). Reporting guidelines and templates for checklists and flow charts can be downloaded from the <a href="#">Equator Web site</a> | <input checked="" type="checkbox"/> | <input type="checkbox"/> |
| <b>Reporting Figures and Tables.</b> We have read and adhere to the <a href="#">BJU International Guidelines for Reporting of Figures and Tables</a>                                                                                                                                                                                                                               | <input checked="" type="checkbox"/> | <input type="checkbox"/> |

| COVER LETTER                                                                                                                                                                                                                                                      | Yes                                 | No/Not Applicable                   |
|-------------------------------------------------------------------------------------------------------------------------------------------------------------------------------------------------------------------------------------------------------------------|-------------------------------------|-------------------------------------|
| We include a cover letter                                                                                                                                                                                                                                         | <input checked="" type="checkbox"/> |                                     |
| The cover letter summarizes the key message of the manuscript                                                                                                                                                                                                     | <input checked="" type="checkbox"/> |                                     |
| The cover letter confirms that the paper has not been submitted elsewhere                                                                                                                                                                                         | <input checked="" type="checkbox"/> |                                     |
| The cover letter includes any additional pertinent information                                                                                                                                                                                                    | <input checked="" type="checkbox"/> | <input type="checkbox"/>            |
| <b>Patient consent form for videos</b> (if applicable). The corresponding author confirms in the covering letter that a signed release form has been received from each patient videoed authorizing the offline and/or online distribution of this video material | <input type="checkbox"/>            | <input checked="" type="checkbox"/> |

| BJU International has 8 different Article Types. Please choose the one that applies to your submission: | Yes                                 |
|---------------------------------------------------------------------------------------------------------|-------------------------------------|
| (1) Original Article                                                                                    | <input checked="" type="checkbox"/> |
| (2) Review Article                                                                                      | <input type="checkbox"/>            |
| (3) Comment Article                                                                                     | <input type="checkbox"/>            |
| (4) Research Letter                                                                                     | <input type="checkbox"/>            |
| (5) Step-by-Step Article                                                                                | <input type="checkbox"/>            |
| (6) Case of the Month (by invitation only)                                                              | <input type="checkbox"/>            |
| (7) Editorial (only commissioned by the Editor)                                                         | <input type="checkbox"/>            |
| (8) Letter to the Editor                                                                                | <input type="checkbox"/>            |
|                                                                                                         | <input type="checkbox"/>            |

| Please fill out the information relevant to your Article Type:                                                                                           |      |                                     |
|----------------------------------------------------------------------------------------------------------------------------------------------------------|------|-------------------------------------|
| <b>(1) Original Article</b>                                                                                                                              |      |                                     |
| <b>Word count:</b> max 4000 words (type the actual word count in the box)                                                                                | 2735 |                                     |
| <b>Abstract format:</b> <i>Objectives; Subjects/patients (or materials) and methods; Results; Conclusion</i>                                             |      | <input checked="" type="checkbox"/> |
| <b>Key words:</b> 5–10 key words                                                                                                                         |      | <input checked="" type="checkbox"/> |
| <b>Manuscript text subheadings:</b> <i>Introduction; Subjects/Patients (or Materials) and Methods; Results; Discussion; Acknowledgements; References</i> |      | <input checked="" type="checkbox"/> |
| <b>Legends to Figures</b>                                                                                                                                |      | <input checked="" type="checkbox"/> |
| <b>Figures:</b> max 3 (type the number of figures in the box)                                                                                            | 1    |                                     |
| <b>Tables:</b> max 3 (type the number of tables in the box)                                                                                              | 2    |                                     |
| <b>References:</b> max 30 (type the number of references in the box)                                                                                     | 26   |                                     |
| <b>(2) Narrative Review/Systematic Review</b>                                                                                                            |      |                                     |
| <b>Word count:</b> max 4000/5000 words (type the word count in the box)                                                                                  |      |                                     |
| <b>Figures or Tables:</b> max 6 total (type the number in the box)                                                                                       |      |                                     |
| <b>References:</b> 50/no max                                                                                                                             |      | <input type="checkbox"/>            |
| <b>Systematic Reviews:</b> The study was pre-registered in PROSPERO                                                                                      |      | <input type="checkbox"/>            |
| <b>(3) Comment Article</b>                                                                                                                               |      |                                     |
| <b>Word count:</b> max 1000 words (type the actual word count in the box)                                                                                |      |                                     |
| <b>Figure or Table:</b> max 1                                                                                                                            |      | <input type="checkbox"/>            |
| <b>References:</b> max 6 (type the number of references in the box)                                                                                      |      |                                     |
| <b>(4) Research Letter</b>                                                                                                                               |      |                                     |
| <b>Subheadings.</b> The manuscript has NO subheadings                                                                                                    |      | <input type="checkbox"/>            |
| <b>Word count:</b> max 1200 words (type the actual word count in the box)                                                                                |      |                                     |
| <b>Figure or Table:</b> max 1                                                                                                                            |      | <input type="checkbox"/>            |
| <b>References:</b> max 8 (type the number of references in the box)                                                                                      |      |                                     |
| <b>(5) Step-by-Step Article</b>                                                                                                                          |      |                                     |
| <b>Word count:</b> max 1200 words (type the actual word count in the box)                                                                                |      |                                     |
| <b>Figure or Table:</b> max 3 for key stages of the procedure                                                                                            |      | <input type="checkbox"/>            |
| <b>References:</b> max 8 (type the number of references in the box)                                                                                      |      |                                     |
| <b>Video:</b> max 8 minutes                                                                                                                              |      | <input type="checkbox"/>            |
| <b>(6) Case of the Month</b>                                                                                                                             |      |                                     |
| We have been invited by a BJUI Editor to write this article                                                                                              |      | <input type="checkbox"/>            |
| <b>(7) Editorial</b>                                                                                                                                     |      |                                     |
| We have been invited by a BJUI Editor to write this article                                                                                              |      | <input type="checkbox"/>            |
| <b>Abstract.</b> The manuscript has NO abstract                                                                                                          |      | <input type="checkbox"/>            |
| <b>Word count:</b> 500–800 words (type the actual word count in the box)                                                                                 |      |                                     |
| <b>Figure or Table:</b> max 1 total                                                                                                                      |      | <input type="checkbox"/>            |
| <b>References:</b> max 6 (type the number of references in the box)                                                                                      | 26   |                                     |
| <b>(8) Letter to the Editor</b>                                                                                                                          |      |                                     |
| <b>Word count:</b> max 500 words (type the actual word count in the box)                                                                                 |      | <input type="checkbox"/>            |
| <b>References:</b> max 4 (type the number of references in the box)                                                                                      |      | <input type="checkbox"/>            |
|                                                                                                                                                          |      |                                     |
|                                                                                                                                                          |      |                                     |
